# Supplementary material
Source: bioRxiv or medRxiv preprint supplement (https://www.biorxiv.org/highwire/filestream/13960/field_highwire_adjunct_files/0/050054-1.pdf)
Supplement: Supplementary file [file 050054-1.pdf]

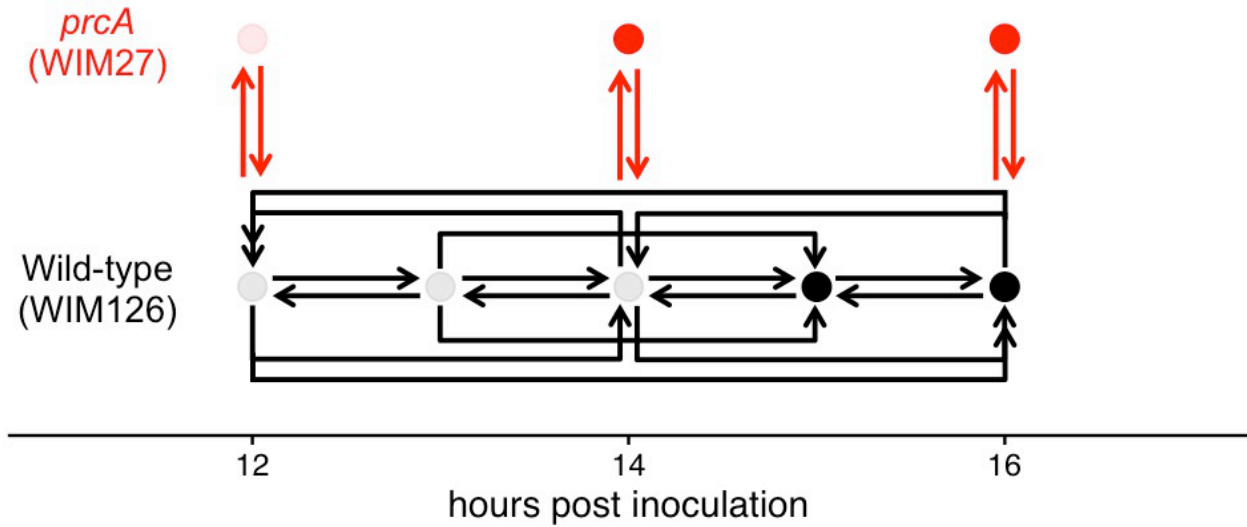

### Supplementary Figure 1.

Microarray circuit, where each line represents a single competitive hybridization and each sample comparison includes dye-swapped technical replicates. Under the medium density culture conditions used, wild-type acquires competence between 14 and 15 hours, while *prcA* acquires competence between 12 and 14 hours.

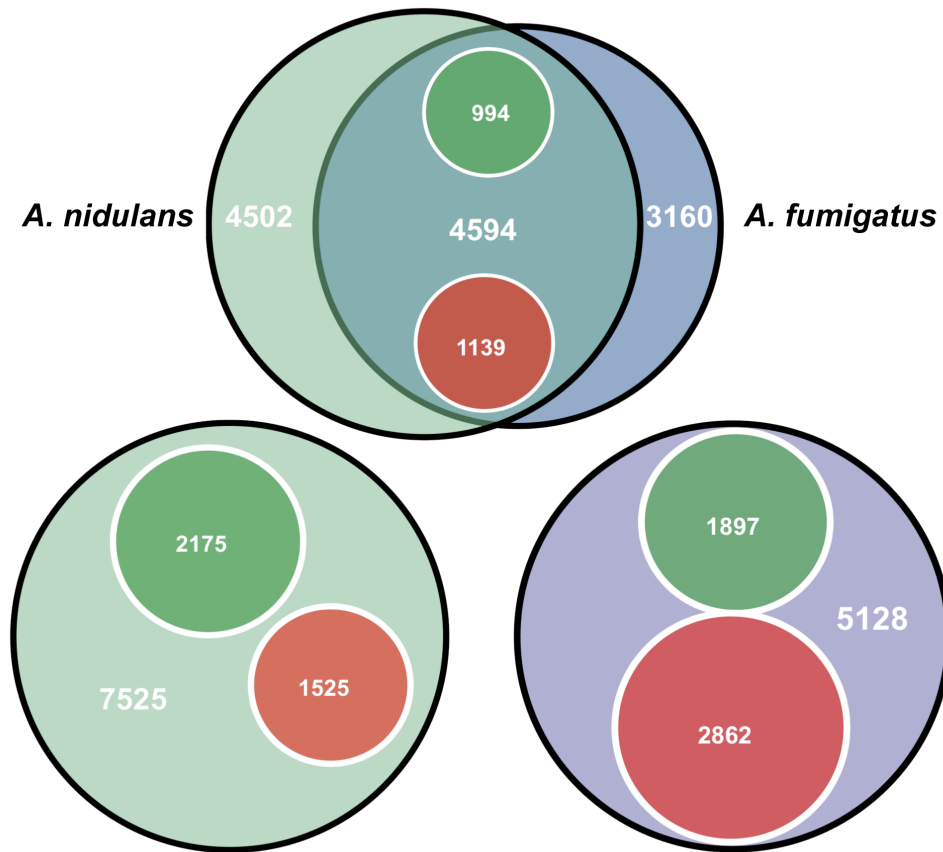

**Supplementary Figure 2.**

Venn diagram of competence regulated gene expression concordant between *A. nidulans* (16 hours) and *A. fumigatus* (12 hours). Overlap represents number of orthologs – upregulated in green, downregulated in red. Lower diagrams show significantly differentially expressed genes by species.

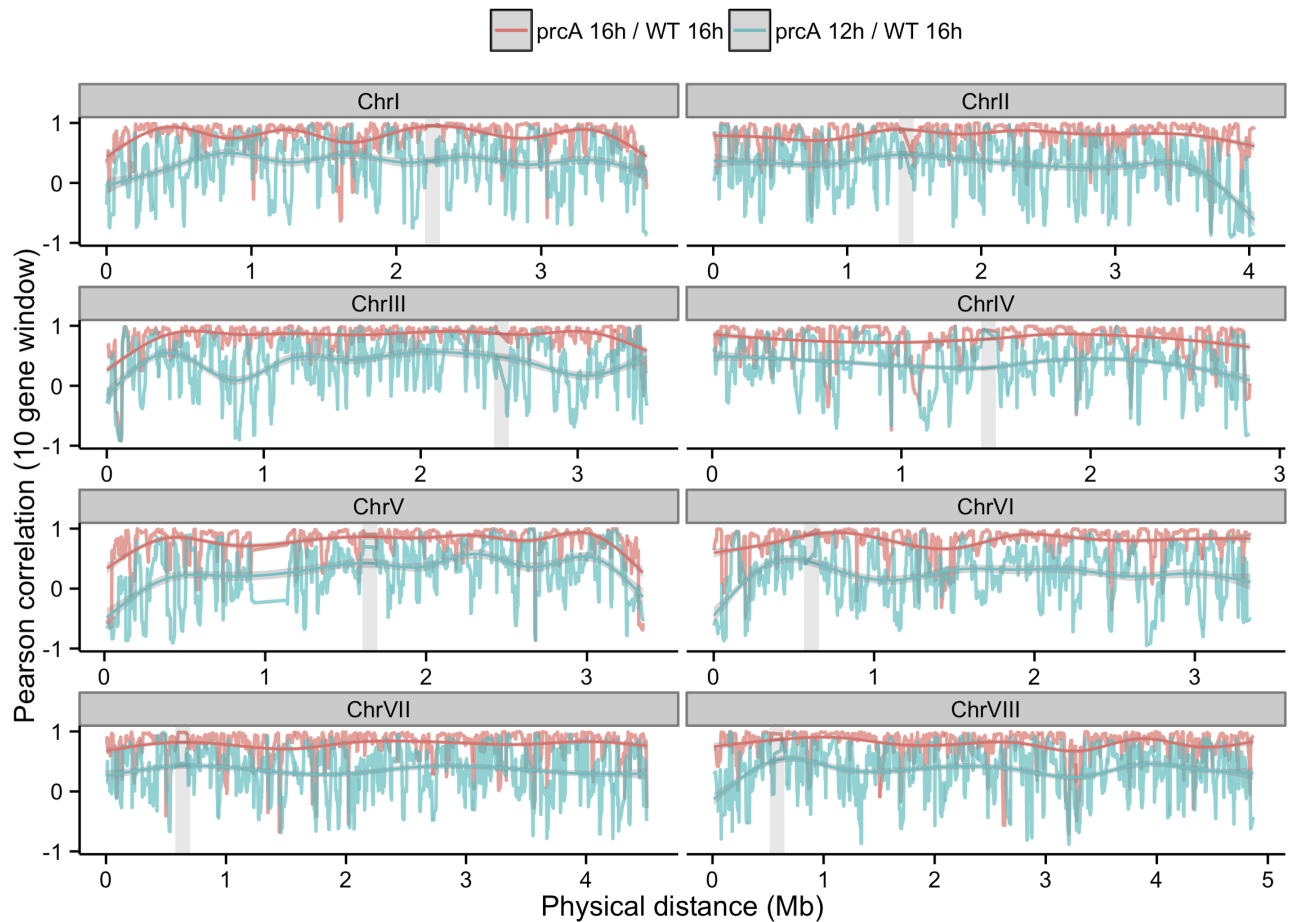

### Supplementary Figure 3.

Correlation in gene expression between wild-type *A. nidulans* and *prcA* at 12 and 16 hours. A LOESS regression is plotted over coefficients for a 10 gene sliding window. Centromere positions are indicated by shaded bars.

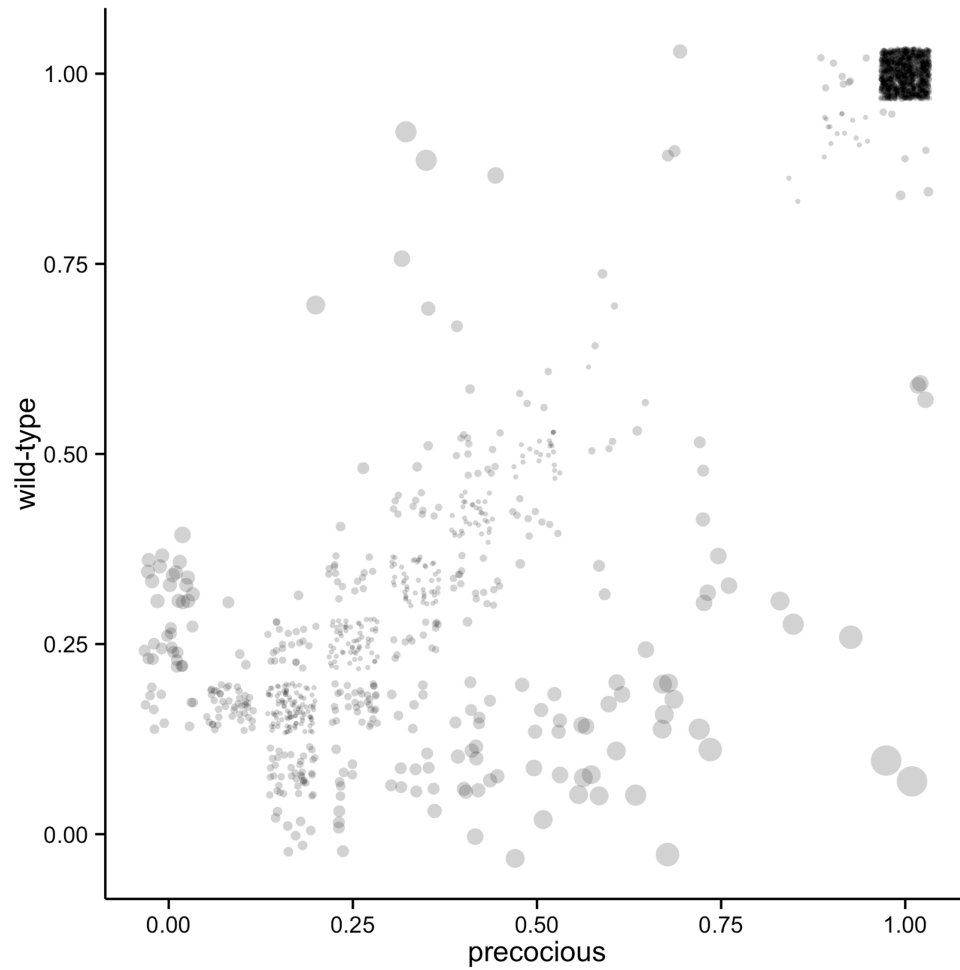

**Supplementary Figure 4.**

Variant frequencies in wild-type and *precocious* sequenced bulks (12 genomes each). Point size is scaled by skew, and points for each cell of the 13 x 13 matrix are dispersed to minimise overplotting.

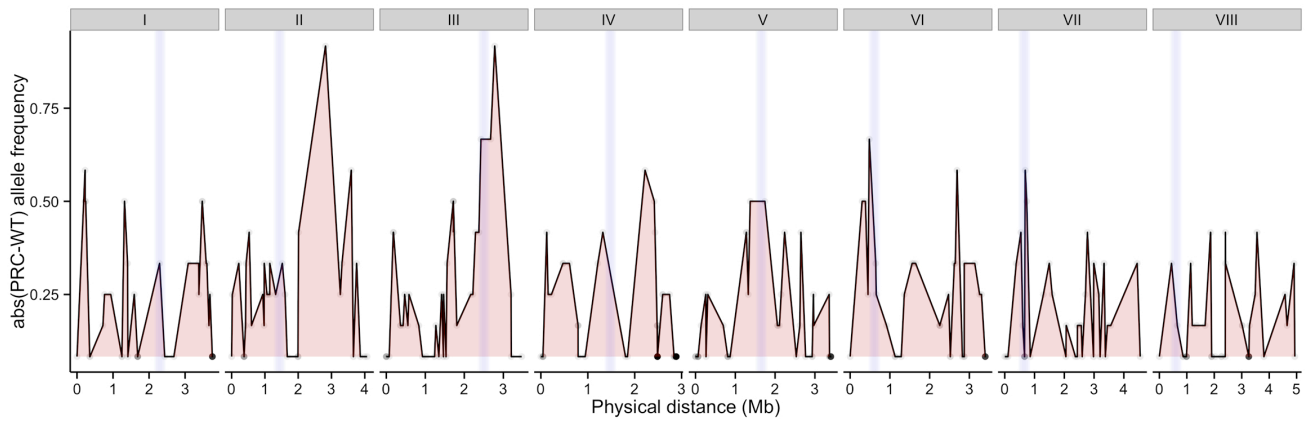

### Supplementary Figure 5.

Variant differentiation between wild-type and *precocious* sequenced bulk genomes. Two high frequency variants on chromosomes II and III show evidence of linkage disequilibrium extending over several hundred kilobases. Centromere positions are indicated by shaded bars.

## Supplementary Table 1

| Name        | Strain ID | Genotype                                                                               | Source                                  |
|-------------|-----------|----------------------------------------------------------------------------------------|-----------------------------------------|
| MSF         | 58        | <i>yA2, adE20, suA(adE20), AcrA1, galA1, pyroA4, facA303, sB3, nicB8, riboB2, veA1</i> | FGSC                                    |
| A770        | 10076     | <i>pyrG89, pabaB22, riboB2, veA1</i>                                                   | FGSC                                    |
| A234        | 10380     | <i>yA2, pabaA1, veA1</i>                                                               | FGSC                                    |
| catABΔ      | 10383     | <i>biA1, catAΔ(argB), metG1, catBΔ(argB) veA1</i>                                      | Kawasaki et al. (1997) - CLK14          |
| msnAΔ       | 10542     | <i>biA1, pabaB22, msnAΔ(Af pyrG), veA1 niiA4</i>                                       | Suzuki (unpublished)                    |
| TNO2A21     | 11036     | <i>pyroA4, riboB2, veA1, nkuAΔ</i>                                                     | Hynes (unpublished)                     |
| TNO2A25     | 11037     | <i>pyrG89, pabaB22 nkuAΔ(argB), veA1 riboB2</i>                                        | Hynes (unpublished)                     |
| MUS51BARB12 | 11068     | <i>pyroA4, pyrG89, veA1, nkuAΔ</i>                                                     | Hynes (unpublished)                     |
| WIM28       | 11597     | <i>prcA, prcB</i>                                                                      | L. N. Yager                             |
| WIM27       | 11598     | <i>prcA</i>                                                                            | L. N. Yager                             |
| WIM126      | 11599     | <i>yA2 pabaA1</i>                                                                      | L. N. Yager                             |
| W27UPR24    | 11774     | <i>prcA, pyrG89, pabaB22, riboB2</i>                                                   | WIM27 x A770                            |
| PP3         | 11892     | <i>yA2, prcA, pabaA1</i>                                                               | WIM27 x A234                            |
| WIM27PNG15  | 12016     | <i>wA3, prcA, pabaA1, niiA4, gatA312</i>                                               | PP3 x RSB12                             |
| PPU+        | 12042     | <i>yA2 pabaA1 pyrG89, pyroA4 nkuAΔ(Bar)</i>                                            | WIM126 x MUS51BARB12                    |
| PPU-        | 12043     | <i>yA2 pabaA1 pyrG89, pyroA4 nkuAΔ(Bar), veA1</i>                                      | WIM126 x MUS51BARB12                    |
| AN1060Δ9    | 12062     | <i>pyrG89, pabaB22 nkuAΔ(argB), veA1 kdmAΔ(Nc pyr-4) riboB2</i>                        | Transformation (TNO2A25)                |
| AN1060Δ12   | 12063     | <i>pyrG89, pabaB22 nkuAΔ(argB), veA1 kdmAΔ(Nc pyr-4) riboB2</i>                        | Transformation (TNO2A25)                |
| W271/2      | 12076     | <i>prcA, pyrG89</i>                                                                    | WIM27 x WIM27UPR24                      |
| W28UR2/5    | 12077     | <i>prcA, prcB, pyrG89, riboB2</i>                                                      | WIM28 x WIM27UPR24                      |
|             | 12096     | W27PNG15/MSF diploid                                                                   | 12016/58                                |
| PUTA29-     | 12097     | <i>yA2, alcA(P)-brlA, pabaA1, pyrG89, nkuAΔ(bar), veA1</i>                             | Transformation (pTA29 -> PPU-)          |
| PUTA29+     | 12098     | <i>yA2, alcA(P)-brlA, pabaA1, pyrG89, nkuAΔ(bar)</i>                                   | Transformation (pTA29 -> PPU+)          |
| WIM126 5-AC | 12199     | <i>yA2, pabaA1</i>                                                                     | 5-azacytidine treatment (WIM126)        |
| W28A103/4   | 12200     | <i>yA1, niiA4, prcB, veA1</i>                                                          | WIM28 x MUS51BARA10                     |
| dmrAΔ       | 12209     | <i>yA2 pabaA1 pyroA4 pyrG89 nkuAΔ(bar) dmrAΔ(Ncr pyr-4)</i>                            | Transformation (PPU+)                   |
| AN1060ΔPV+  | 12211     | <i>pabaA1 pyrG89, kdmAΔ(Nc pyr-4)</i>                                                  | AN1060K012 x WIM126                     |
| csnEΔ13     | 12212     | <i>yA2, pabaA1, csnEΔ(Nc pyr-4), pyroA4, nkuAΔ</i>                                     | Transformation (PPU+)                   |
| RJW75.2     | 12270     | <i>pyroA4 stcEΔ bre2Δ(Af pyroA) veA1</i>                                               | N. P. Keller/J. Strauss                 |
| RJW77.3     | 12271     | <i>pyroA4 stcEΔ lsdAΔ(Af pyroA) veA1</i>                                               | N. P. Keller/J. Strauss                 |
| RJW80.5     | 12272     | <i>pyroA4 stcEΔ rtf1Δ(Af pyroA) veA1</i>                                               | N. P. Keller/J. Strauss                 |
| RJW89.4     | 12273     | <i>pyroA4 stcEΔ cdc73Δ(Af pyroA) veA1</i>                                              | N. P. Keller/J. Strauss                 |
| AN1060xP10  | 12289     | <i>yA1::[pLN7807] pyrG89, pyroA4, veA1</i>                                             | Transformation (pLN7807 -> MUS51BARB12) |
| AN1060xP11  | 12290     | <i>pyrG89, pyroA4, veA1 AN1060::[pLN7807]</i>                                          | Transformation (pLN7807 -> MUS51BARB12) |
| LO1946      | 12324     | <i>pyrG89, pyroA4, hhoA-GFP(Af pyroA), veA1 riboB2</i>                                 | Oakley Lab. - LO1946                    |
| PRENB16     | 12422     | <i>wA3, niiA4, gatA312, prcA, veA1</i>                                                 | WIM27 x RSB12                           |
| kdmAGFP16   | 12465     | <i>pyrG89, hhoA-GFP(Af pyroA), kdmAΔ(Nc pyr-4)</i>                                     | KOPV+ x LO1946                          |
|             | 12470     | PRENB16/MSF diploid                                                                    | 12422/58                                |
| PBNB10      | 12489     | <i>wA3, prcA, prcB, niiA4, biA1</i>                                                    | RSB12 x WIM28                           |
| WH1GFP6     | 12508     | <i>pabaA1, hhoA-GFP(Af pyroA)</i>                                                      | WIM126 x LO1946                         |
| PAH1GFP5    | 12509     | <i>prcA, histone H1-GFP(Af pyroA), pyroA?, nkuA?</i>                                   | WIM27 x LO1946                          |
| PABH1GFP1   | 12510     | <i>prcA, prcB, hhoA-GFP(Af pyroA), pyroA?, nkuA?</i>                                   | WIM28 x LO1946                          |
| csnEH1GFP7  | 12515     | <i>csnEΔ(Nc pyr-4), hhoA-GFP(Af pyroA), pyroA?, nkuA?</i>                              | csnEKO7 x LO1946                        |
|             | 12516     | PBNB10/MSF diploid                                                                     | 12489/58                                |
| PABH13      | 12595     | <i>prcA, prcB, hhoA-GFP(Af pyroA)</i>                                                  | PABH1GFP1 x WIM126                      |
| xPkdm+      | 12600     | <i>pabaA1 pyrG89, AN1060::[pLN7807]</i>                                                | AN1060xP11x WIM126                      |
| AN0888Δ     | 12632     | <i>biA1, wA3, argB2, pyroA4, AN0888Δ(argB) veA1 riboB2</i>                             | J. Strauss                              |
| AN8211Δ     | 12633     | <i>pabaA1 pyrG89, AN8211Δ(riboB), argB2, nkuAΔ(argB), veA1 riboB2</i>                  | J. Strauss                              |
| aodAΔ       | 12650     | <i>nkuAΔ(argB), AN2099Δ(Af pyroA), veA1 niiA4</i>                                      | Hynes (unpublished)                     |
| xPkdmAPU13  | 12809     | <i>yA2 pabaA1 pyrG89, AN1060::[pLN7807]</i>                                            | xPkdm+ x WIM126                         |
| YPU16       | 12810     | <i>yA2 pabaA1 pyrG89</i>                                                               | xPkdm+ x WIM126                         |
| 1Δ11-1      | 12915     | <i>AN1997-Af pyroA (TNO2A21 background)</i>                                            | Transformation (disruption -> TNO2A21)  |
| 2F7-1       | 12916     | <i>AN9060-Af pyroA (TNO2A21 background)</i>                                            | Transformation (disruption -> TNO2A21)  |
| 1E3-1       | 12917     | <i>AN2012-Af pyroA (TNO2A21 background)</i>                                            | Transformation (disruption -> TNO2A21)  |
| 1Δ9-3       | 12918     | <i>AN1944-Af pyroA (TNO2A21 background)</i>                                            | Transformation (disruption -> TNO2A21)  |
| 2Δ1-1       | 12919     | <i>AN7170-Af pyroA (TNO2A21 background)</i>                                            | Transformation (disruption -> TNO2A21)  |
| 2F1-1       | 12920     | <i>AN8636-Af pyroA (TNO2A21 background)</i>                                            | Transformation (disruption -> TNO2A21)  |
| 2E7-2       | 12921     | <i>AN7873-Af pyroA (TNO2A21 background)</i>                                            | Transformation (disruption -> TNO2A21)  |
| 1F9-2       | 12922     | <i>AN3280-Af pyroA (TNO2A21 background)</i>                                            | Transformation (disruption -> TNO2A21)  |
| 1A11-1      | 12923     | <i>AN0785-Af pyroA (TNO2A21 background)</i>                                            | Transformation (disruption -> TNO2A21)  |

| Name  | Strain ID | Genotype                                 | Source                                   |
|-------|-----------|------------------------------------------|------------------------------------------|
| 2G3-1 | 12924     | AN9397-Af pyroA (TNO2A21 background)     | Transformation (disruption -> TNO2A21)   |
| 2F9-2 | 12925     | AN9090-Af pyroA (TNO2A21 background)     | Transformation (disruption -> TNO2A21)   |
| 2F9-1 | 12926     | AN9090-Af pyroA (TNO2A21 background)     | Transformation (disruption -> TNO2A21)   |
| 1F3-1 | 12927     | AN2893-Af pyroA (TNO2A21 background)     | Transformation (disruption -> TNO2A21)   |
| 1F7-1 | 12928     | AN3075-Af pyroA (TNO2A21 background)     | Transformation (disruption -> TNO2A21)   |
| 2-2   | 12929     | AN1569-Af pyroA (PPU+ background)        | Transformation (deletion -> PPU+)        |
| 3-2   | 12930     | AN2001-Af pyroA (PPU+ background)        | Transformation (deletion -> PPU+)        |
| 3-6   | 12931     | AN2001-Af pyroA (PPU+ background)        | Transformation (deletion -> PPU+)        |
| 4-5   | 12932     | AN2036-Af pyroA (PPU+ background)        | Transformation (deletion -> PPU+)        |
| 5-2   | 12933     | AN3075-Af pyroA (PPU+ background)        | Transformation (deletion -> PPU+)        |
| 5-5   | 12934     | AN3075-Af pyroA (PPU+ background)        | Transformation (deletion -> PPU+)        |
| 7-1   | 12935     | AN3433-Af pyroA (PPU+ background)        | Transformation (deletion -> PPU+)        |
| 8-5   | 12936     | AN5775-Af pyroA (PPU+ background)        | Transformation (deletion -> PPU+)        |
| 8-9   | 12937     | AN5775-Af pyroA (PPU+ background)        | Transformation (deletion -> PPU+)        |
| 9-1   | 12938     | AN5870-Af pyroA (PPU+ background)        | Transformation (deletion -> PPU+)        |
| 9-2   | 12939     | AN5870-Af pyroA (PPU+ background)        | Transformation (deletion -> PPU+)        |
| 9-3   | 12940     | AN5870-Af pyroA (PPU+ background)        | Transformation (deletion -> PPU+)        |
| 11-1  | 12941     | AN7896-Af pyroA (PPU+ background)        | Transformation (deletion -> PPU+)        |
| 11-2  | 12942     | AN7896-Af pyroA (PPU+ background)        | Transformation (deletion -> PPU+)        |
| 12-1  | 12943     | AN9147-Af pyroA (PPU+ background)        | Transformation (deletion -> PPU+)        |
| 13-5  | 12944     | AN10906-Af pyroA (PPU+ background)       | Transformation (deletion -> PPU+)        |
| 19-2  | 12945     | AN9060-Af pyroA (PPU+ background)        | Transformation (deletion -> PPU+)        |
| 19-3  | 12946     | AN9060-Af pyroA (PPU+ background)        | Transformation (deletion -> PPU+)        |
| 21-1  | 12947     | AN4878-Af pyroA (PPU+ background)        | Transformation (deletion -> PPU+)        |
| 21-2  | 12948     | AN4878-Af pyroA (PPU+ background)        | Transformation (deletion -> PPU+)        |
| 21-4  | 12949     | AN4878-Af pyroA (PPU+ background)        | Transformation (deletion -> PPU+)        |
| 22-1  | 12950     | AN5209-Af pyroA (PPU+ background)        | Transformation (deletion -> PPU+)        |
| 22-2  | 12951     | AN5209-Af pyroA (PPU+ background)        | Transformation (deletion -> PPU+)        |
| 22-4  | 12952     | AN5209-Af pyroA (PPU+ background)        | Transformation (deletion -> PPU+)        |
| 48-1  | 12953     | AN2893-Af pyroA (PPU+ background)        | Transformation (deletion -> PPU+)        |
| 48-3  | 12954     | AN2893-Af pyroA (PPU+ background)        | Transformation (deletion -> PPU+)        |
| 54-2  | 12955     | AN3688-Af pyroA (PPU+ background)        | Transformation (deletion -> PPU+)        |
| 54-11 | 12956     | AN3688-Af pyroA (PPU+ background)        | Transformation (deletion -> PPU+)        |
| 76-1  | 12957     | AN7170-Af pyroA (PPU+ background)        | Transformation (deletion -> PPU+)        |
| 76-6  | 12958     | AN7170-Af pyroA (PPU+ background)        | Transformation (deletion -> PPU+)        |
| 25-5  | 12959     | AN0307-Af pyroA (MUS51BARB12 background) | Transformation (deletion -> MUS51BARB12) |
| 33-2  | 12960     | AN1170-Af pyroA (MUS51BARB12 background) | Transformation (deletion -> MUS51BARB12) |
| 32-1  | 12961     | AN1160-Af pyroA (MUS51BARB12 background) | Transformation (deletion -> MUS51BARB12) |
| 15-1  | 12962     | AN0709-Af pyroA (MUS51BARB12 background) | Transformation (deletion -> MUS51BARB12) |
| 54-1  | 12963     | AN3688-Af pyroA (MUS51BARB12 background) | Transformation (deletion -> MUS51BARB12) |
| 16-4  | 12964     | AN1875-Af pyroA (MUS51BARB12 background) | Transformation (deletion -> MUS51BARB12) |
| 77-2  | 12965     | AN7173-Af pyroA (MUS51BARB12 background) | Transformation (deletion -> MUS51BARB12) |
| 33-1  | 12966     | AN1170-Af pyroA (MUS51BARB12 background) | Transformation (deletion -> MUS51BARB12) |
| 34-2  | 12967     | AN1267-Af pyroA (MUS51BARB12 background) | Transformation (deletion -> MUS51BARB12) |
| 34-1  | 12968     | AN1267-Af pyroA (MUS51BARB12 background) | Transformation (deletion -> MUS51BARB12) |
| 27-6  | 12969     | AN0557-Af pyroA (MUS51BARB12 background) | Transformation (deletion -> MUS51BARB12) |
| 75-1  | 12970     | AN7169-Af pyroA (MUS51BARB12 background) | Transformation (deletion -> MUS51BARB12) |
| 58-1  | 12971     | AN4051-Af pyroA (MUS51BARB12 background) | Transformation (deletion -> MUS51BARB12) |
| 35-1  | 12972     | AN1338-Af pyroA (MUS51BARB12 background) | Transformation (deletion -> MUS51BARB12) |
| 77-1  | 12973     | AN7173-Af pyroA (MUS51BARB12 background) | Transformation (deletion -> MUS51BARB12) |
| 75-4  | 12974     | AN7169-Af pyroA (MUS51BARB12 background) | Transformation (deletion -> MUS51BARB12) |
| 54-2  | 12975     | AN3688-Af pyroA (MUS51BARB12 background) | Transformation (deletion -> MUS51BARB12) |
| 64-1  | 12976     | AN5130-Af pyroA (MUS51BARB12 background) | Transformation (deletion -> MUS51BARB12) |
| 55-1  | 12977     | AN3799-Af pyroA (MUS51BARB12 background) | Transformation (deletion -> MUS51BARB12) |
| 16-3  | 12978     | AN1875-Af pyroA (MUS51BARB12 background) | Transformation (deletion -> MUS51BARB12) |
| 55-4  | 12979     | AN3799-Af pyroA (MUS51BARB12 background) | Transformation (deletion -> MUS51BARB12) |
| PCV9  | 12980     | prcC, yA2, pabaA1, pyroA4, pyrG89, nkuAΔ | Mutagenesis (PUTA29+)                    |
